# Supplementary material for: Targeting PHGDH reverses the immunosuppressive phenotype of tumor-associated macrophages through α-ketoglutarate and mTORC1 signaling
Source: Springer Nature journal article supplement (doi:10.1038/s41423-024-01134-0), 2024-02-27

Figure 1E

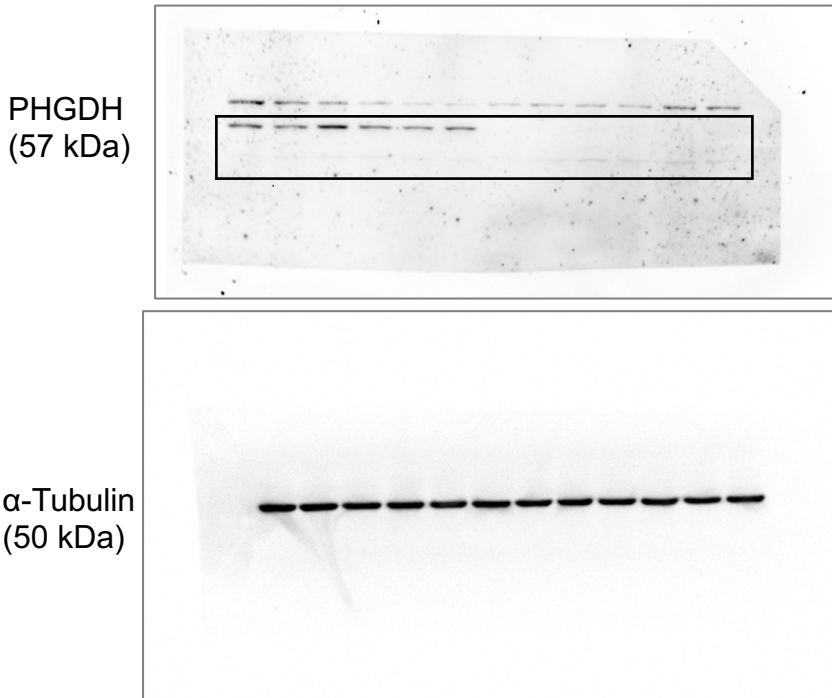

Figure 2B

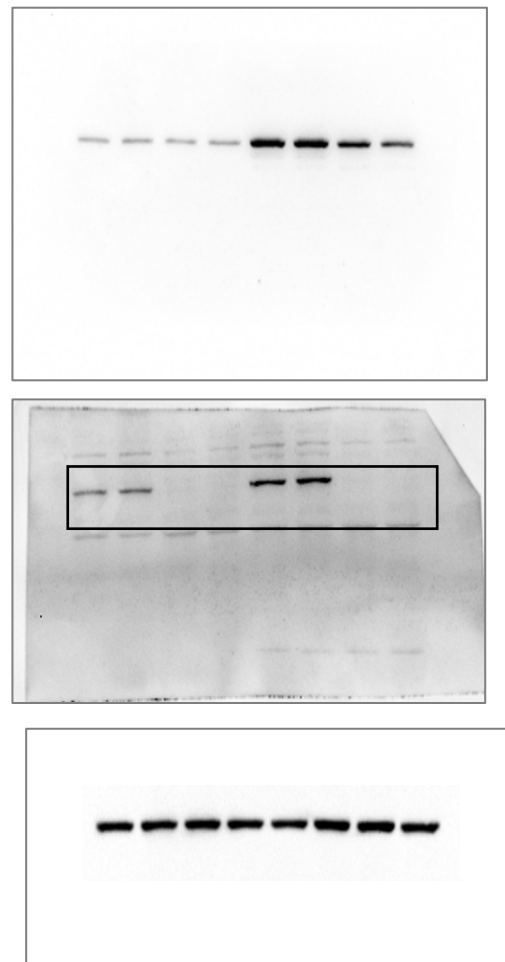

Figure 2A

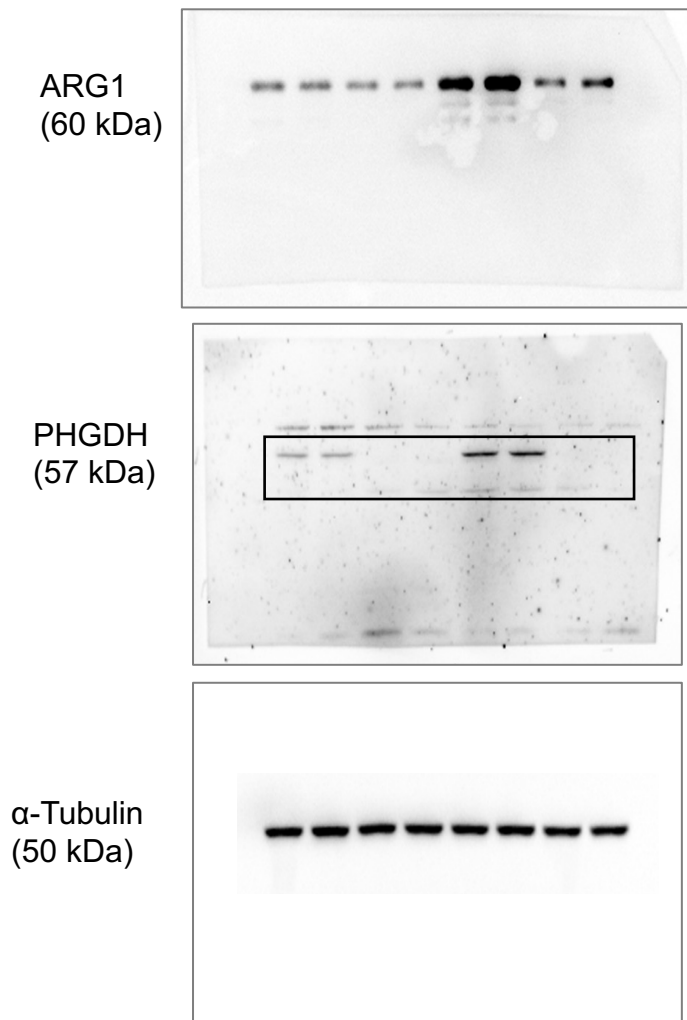

Figure 2J

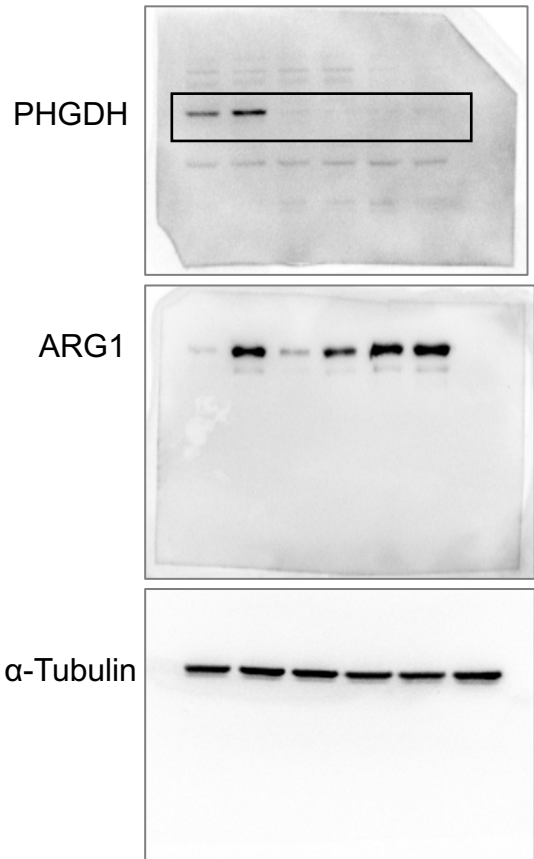

Figure 5I

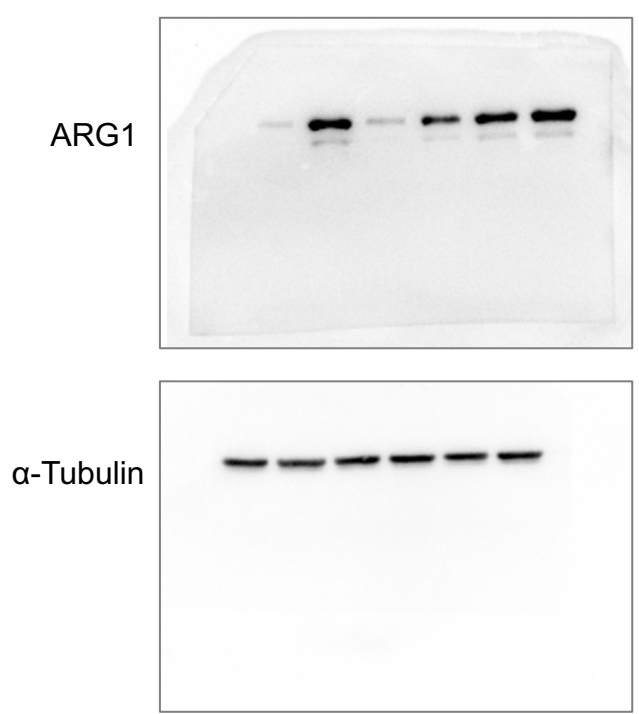

Figure 6B

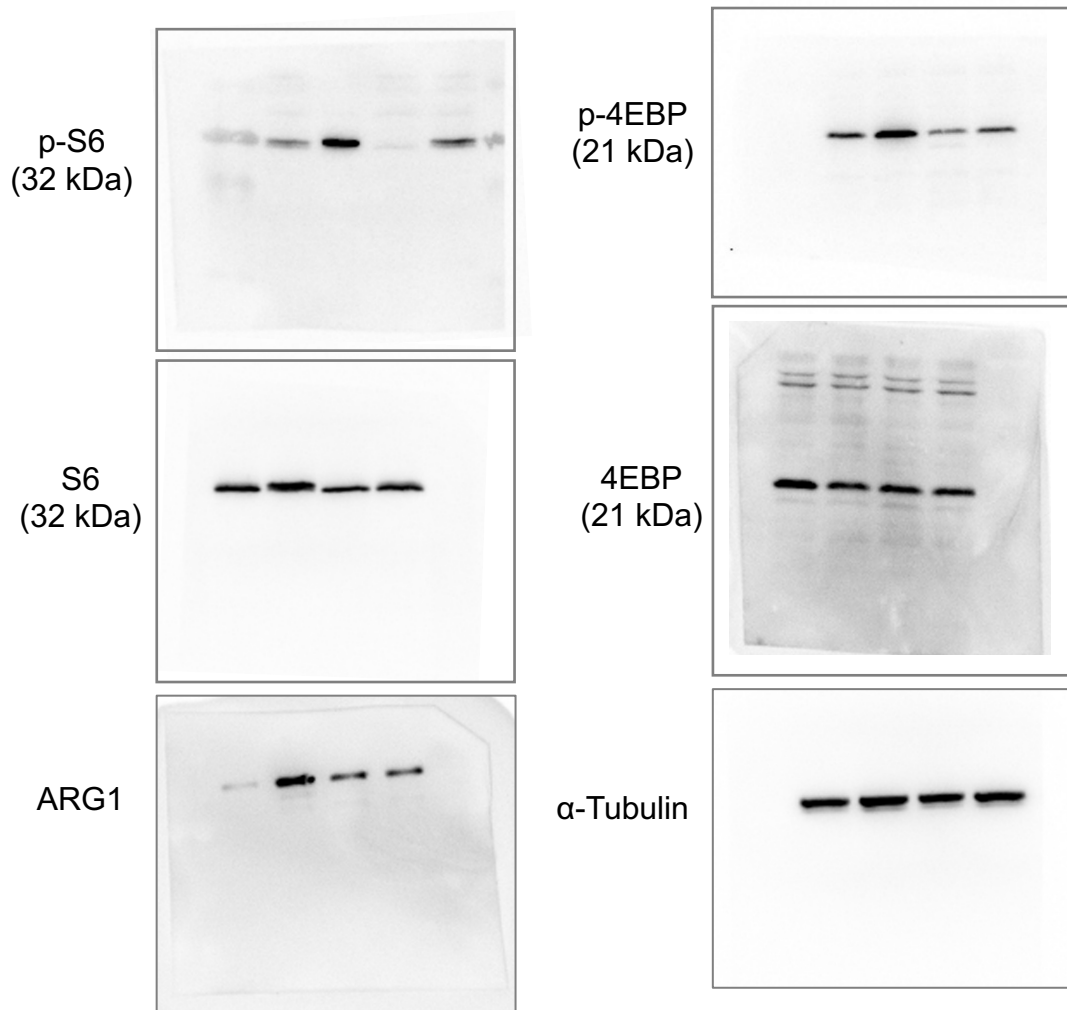

Figure 6E

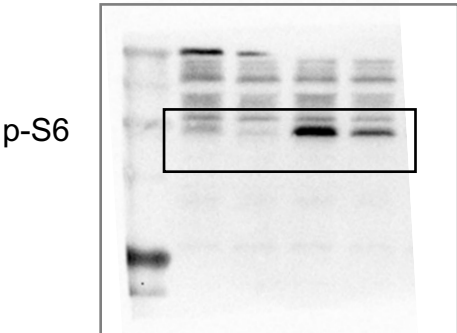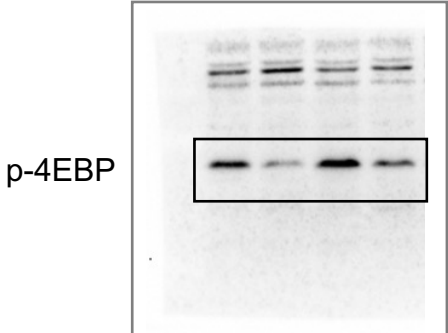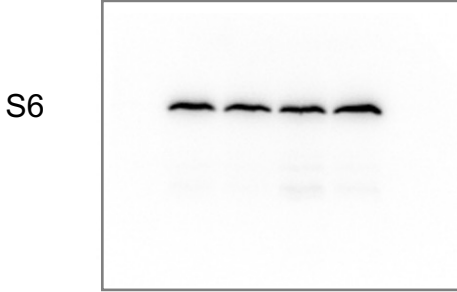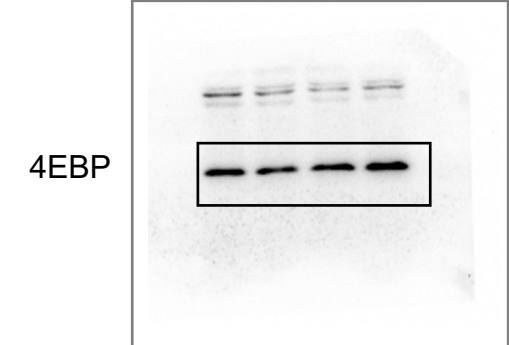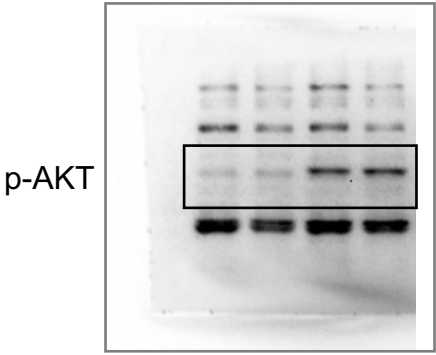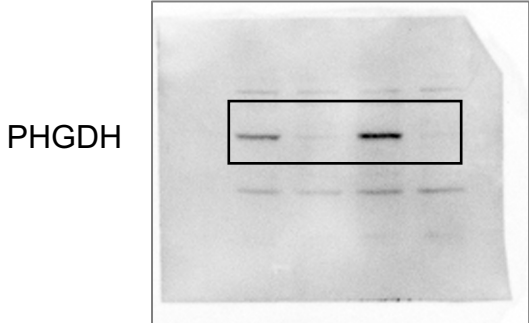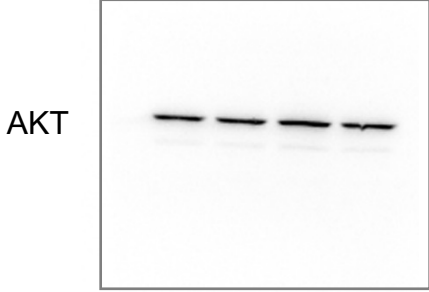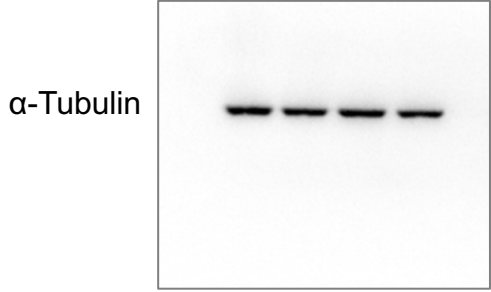

Figure 6G

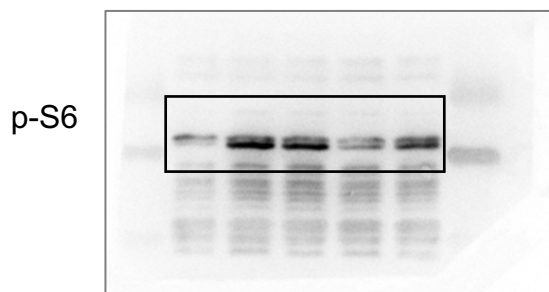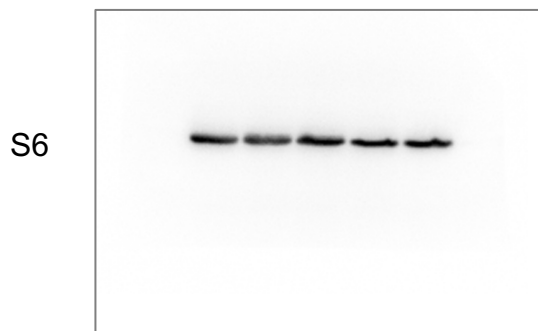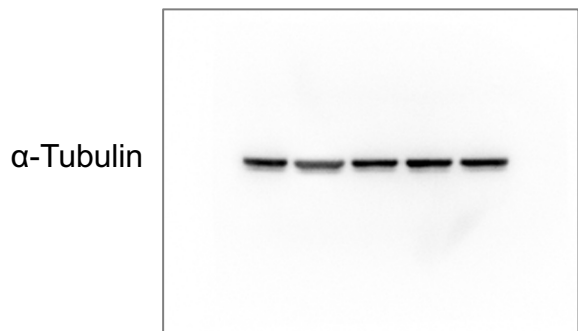

Figure 7B

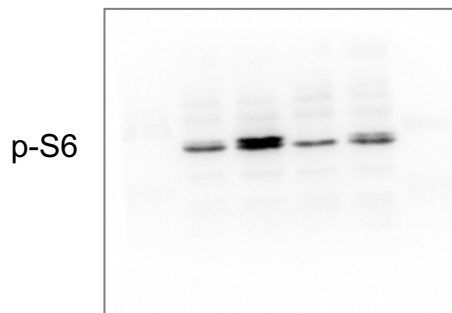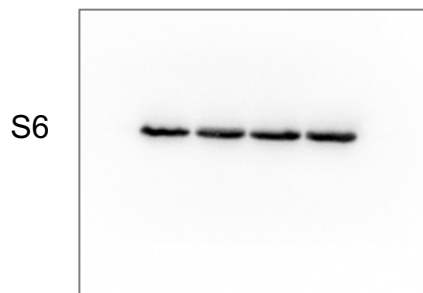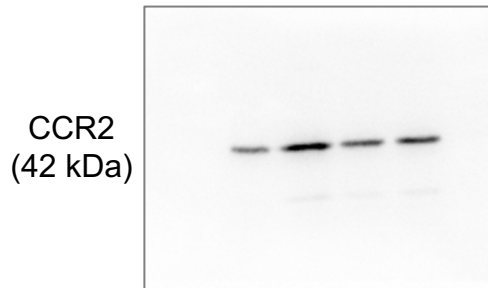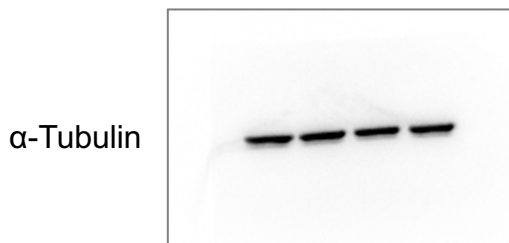

Figure S1B

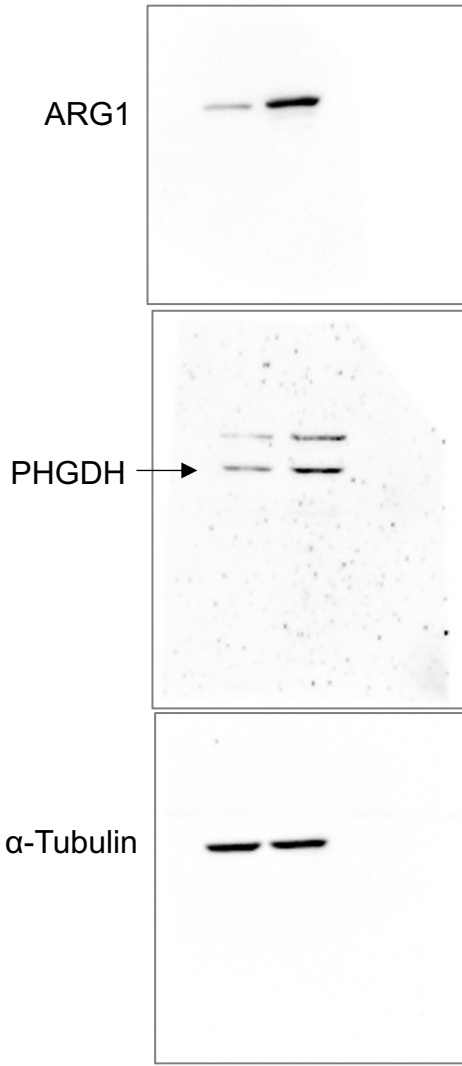

Figure S2A

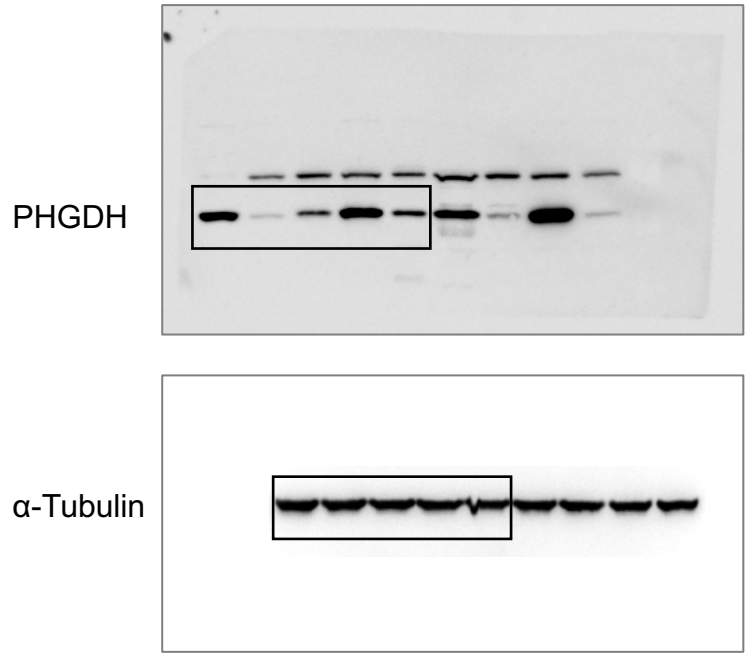

Figure S2B

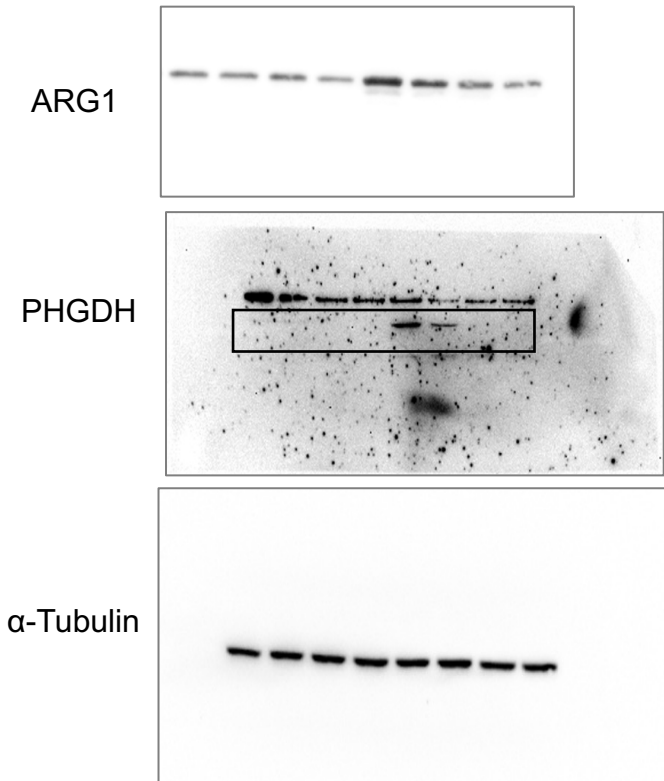

Figure S2C

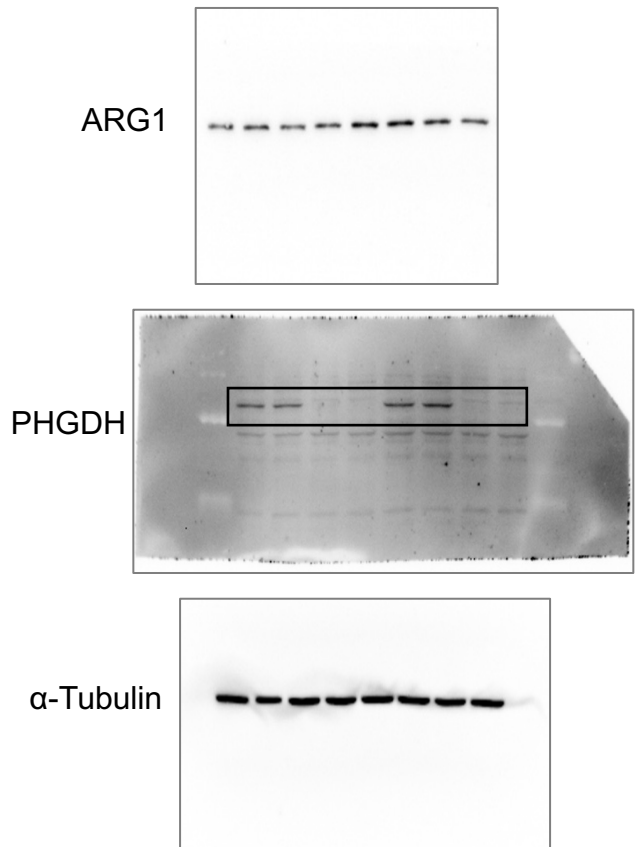

Figure S2G

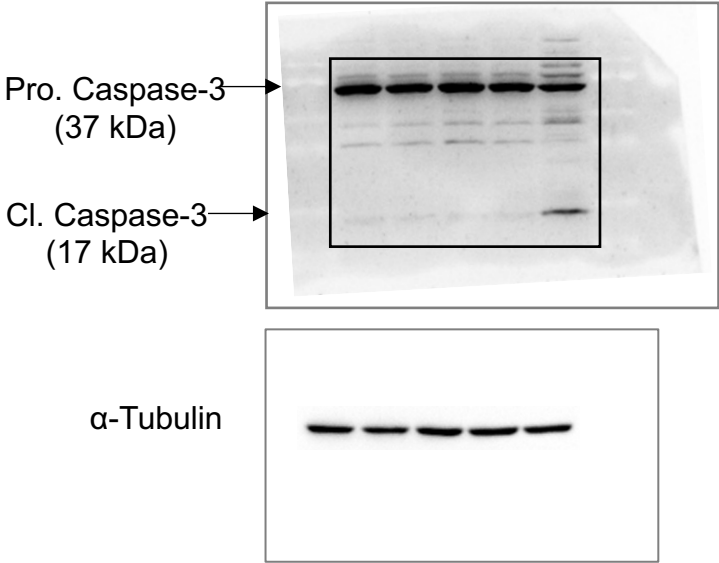

Figure S5B

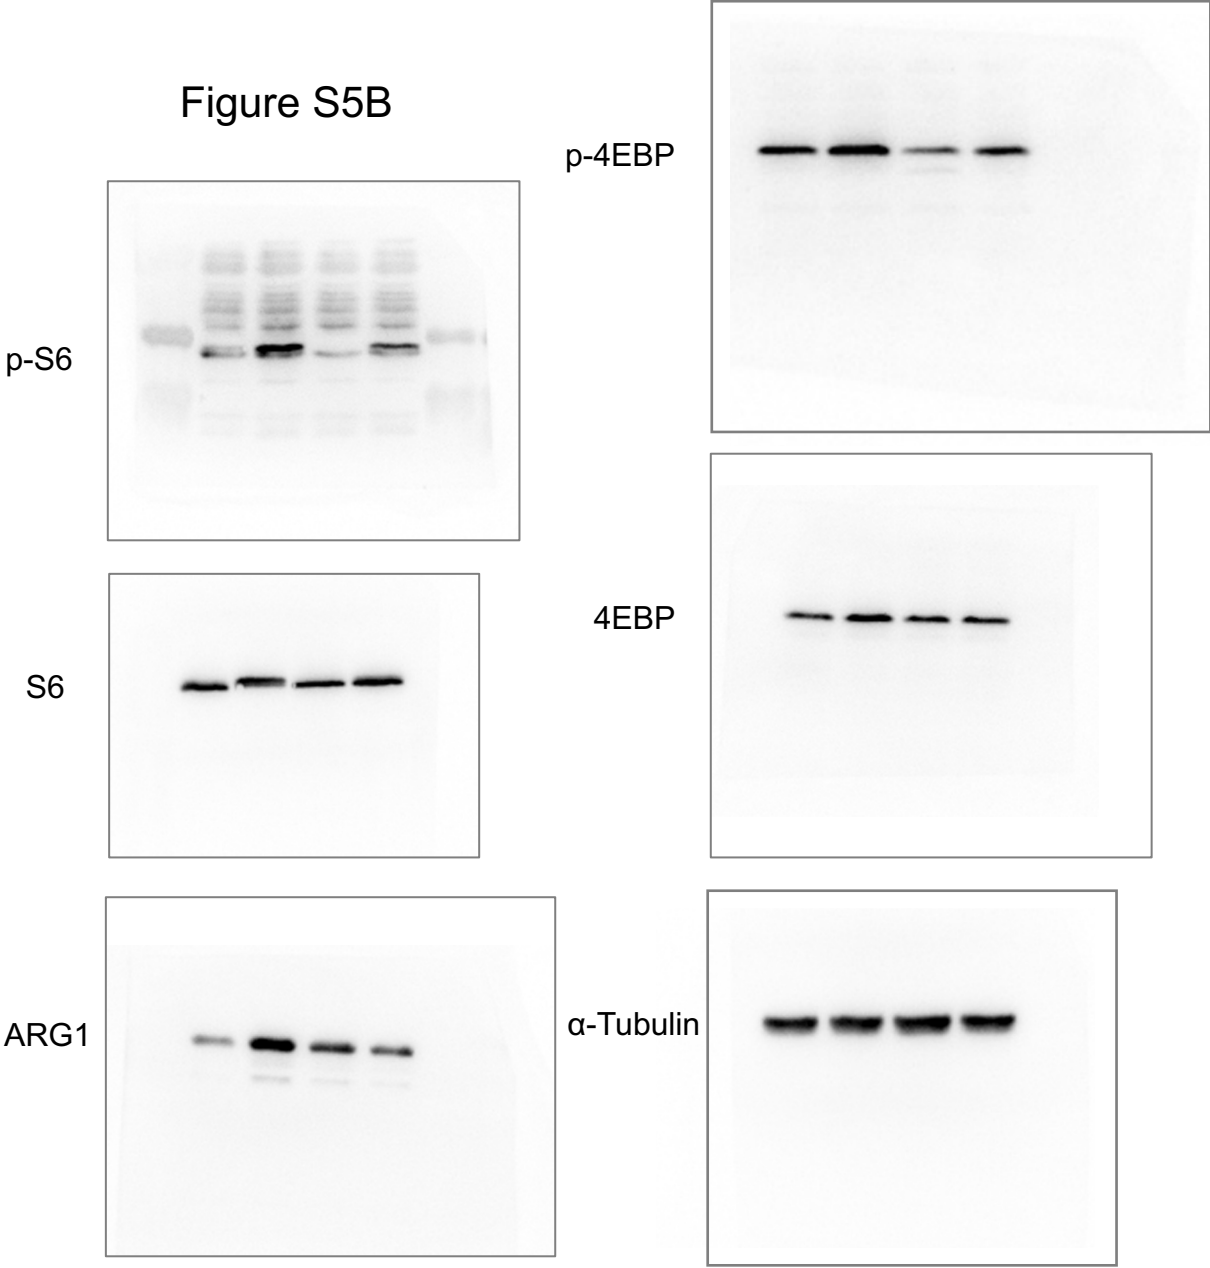

Figure S6B

P-S6

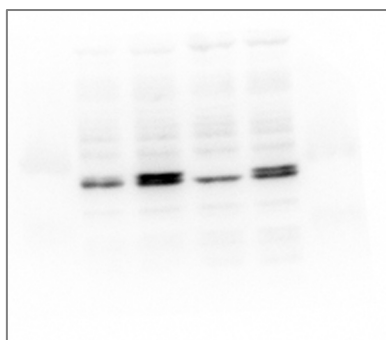

S6

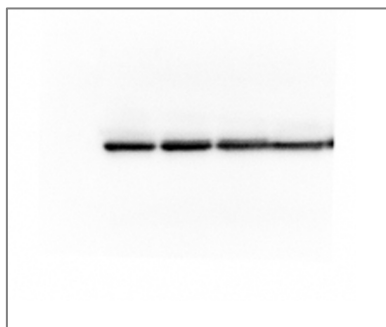

CCR2

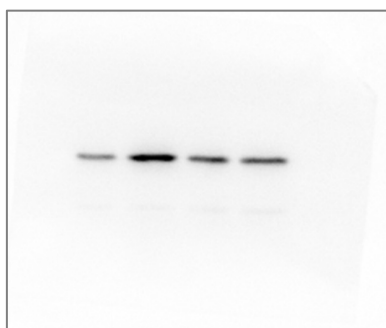

$\alpha$ -Tubulin

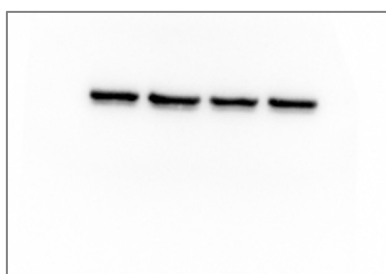

Supplement: 41423_2024_1134_MOESM4_ESM.pdf [file 41423_2024_1134_MOESM4_ESM.pdf]
